# Supplementary material for: The role of EMMPRIN expression in ovarian epithelial carcinomas
Source: PubMed Central journal article supplement — Cell Cycle. 2013 Aug 8;12(17):2899–913. doi: 10.4161/cc.25950 (PMC3899202; doi:10.4161/cc.25950), 2013-08-08
Supplement: cc-12-2899-s01.pdf [file cc-12-2899-s01.pdf]

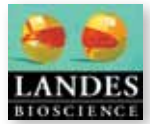

## **Supplemental Material to:**

**Yang Zhao, Shuo Chen, Wen-feng Gou, Zhe-feng Niu,  
Shuang Zhao, Li-jun Xiao, Yasuo Takano  
and Hua-chuan Zheng**

**The role of EMMPRIN expression in ovarian epithelial  
carcinomas**

**Cell Cycle 2013; 12(17)**

**<http://dx.doi.org/10.4161/cc.25950>**

**<http://www.landesbioscience.com/journals/cc/article/25950>**

## Supplementary table 1 Primers' design for RT-PCR

| Names           | Primer' s sequence                                              | Distribution              | AT (°C) | Product size(bp) | Extension time(s) |
|-----------------|-----------------------------------------------------------------|---------------------------|---------|------------------|-------------------|
| <i>EMMPRIN</i>  | 5'- CCCTTCCTGGGCATCGT-3'<br>5'- CGGCGTCGTCATCATCC-3'            | L10240.1<br>645- 741      | 60      | 97               | 34                |
| <i>Wnt5a</i>    | 5' GCGAAGACAGGCATCAAA 3'<br>5' CCTGGCAAAGCGGTAG 3'              | NM-003392<br>946-1240     | 60      | 295              | 34                |
| <i>Akt</i>      | F: 5'-GGGACAGAGGAGCAAGGT-3'<br>R: 5'-CGACAGCGGAAAGGTAA- 3'      | NM_005163<br>2656-2863    | 60      | 208              | 34                |
| <i>P70s6k</i>   | F: 5'-TAAAGCATCCCTTCATCG-3'<br>R: 5'-CAGGCAGTGTCTTCCATAA- 3'    | NM_003161<br>552-690      | 60      | 139              | 34                |
| <i>Bcl xl</i>   | F: 5' -TTCCCAGAAAGGATACAGC-3'<br>R: 5'-GGGTCTCCATCTCCGATT-3'    | Z23115<br>185-276         | 60      | 92               | 34                |
| <i>survivin</i> | F: 5'-CTGGCCAGTGTTCCTT-3'<br>R: 5'-GCTTCCAGTCCCTCCCT-3'         | DQ227257<br>159-282       | 60      | 124              | 34                |
| <i>VEGF</i>     | 5' AGGAGGAGGGCAGAATC 3'<br>5' ATGTGCTGGCCTTGGT 3'               | NM_001171630<br>1131-1388 | 60      | 258              | 34                |
| <i>MMP-9</i>    | 5' TCCCTGGAGACCTGAGAACC 3'<br>5' GCCACCCGAGTGTAACCAT 3'         | NM_004994<br>111-192      | 60      | 82               | 34                |
| <i>GST-π</i>    | 5' TTTCGCCGCCGAGTCT 3'<br>5' TCCACGGTCACCACCTCCTC 3'            | NM_000852<br>225-359      | 60      | 135              | 34                |
| <i>MDR</i>      | 5' AGGCTATCATTACTCTTTACC 3'<br>5' TCTGGCTTCCGTTGC 3'            | NM_000927<br>24-184       | 60      | 161              | 34                |
| <i>GAPDH</i>    | F: 5'-CAATGACCCCTTCATTGACC-3'<br>R: 5'- TGGAAGATGGTGATGGGATT-3' | NM_002046.3<br>201-335    | 60      | 135              | 34                |

AT=annealing temperature.
